# Supplementary material for: Durvalumab as Consolidation Therapy in Post-Concurrent Chemoradiation (CCRT) in Unresectable Stage III Non-Small Cell Lung Cancer Patients: A Multicenter Observational Study
Source: Vaccines (Basel). 2021 Oct 1;9(10):1122. doi: 10.3390/vaccines9101122 (PMC8541274; doi:10.3390/vaccines9101122)
Supplement: Supplementary file 1 [file vaccines-09-01122-s001.zip › vaccines-1376946-supplementary.pdf]

**Supplementary Table S1.** Treatment response to subsequent EGFR-TKIs following durvalumab in 16 EGFR-mutated patients after progressive disease.

| <b>Total</b>                 | <b>N = 16</b> |
|------------------------------|---------------|
| Complete response (CR)       | 0             |
| Partial response (PR)        | 9             |
| Stable disease (SD)          | 3             |
| Progressive disease (PD)     | 0             |
| Not evaluable (NE)           | 4             |
| Response rate (RR) %         | 75            |
| Disease control rate (DCR) % | 100           |
